# Supplementary material
Source: PubMed Central journal article supplement (PMC5837284)

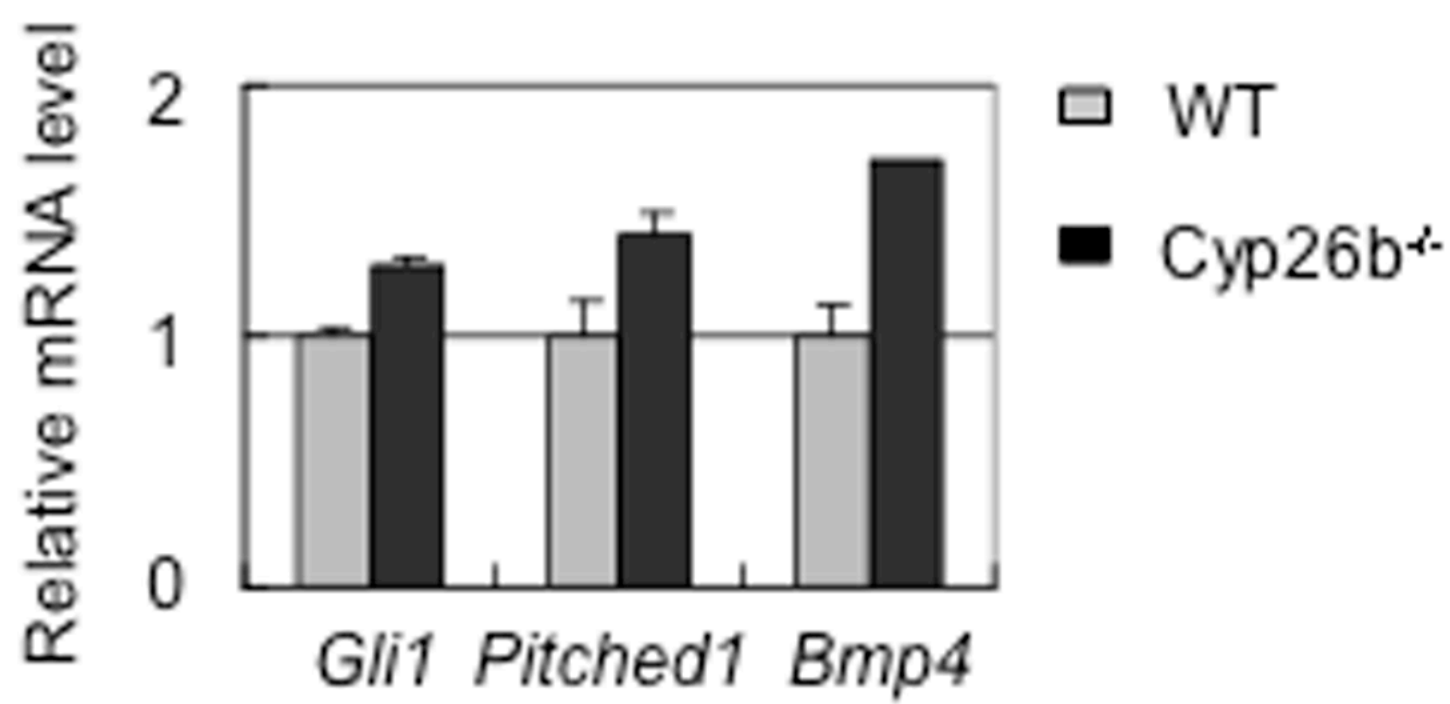

Supplement: NIHMS946750-supplement-Supplementary.pdf [file NIHMS946750-supplement-Supplementary.pdf]
